# Supplementary material
Source: PubMed Central journal article supplement (PMC9233030)
Supplement: NIHMS1800385-supplement-Uncropped_Images_ExtendedData_Fig2.pdf [file NIHMS1800385-supplement-Uncropped_Images_ExtendedData_Fig2.pdf]

## Extended Data Figure 2

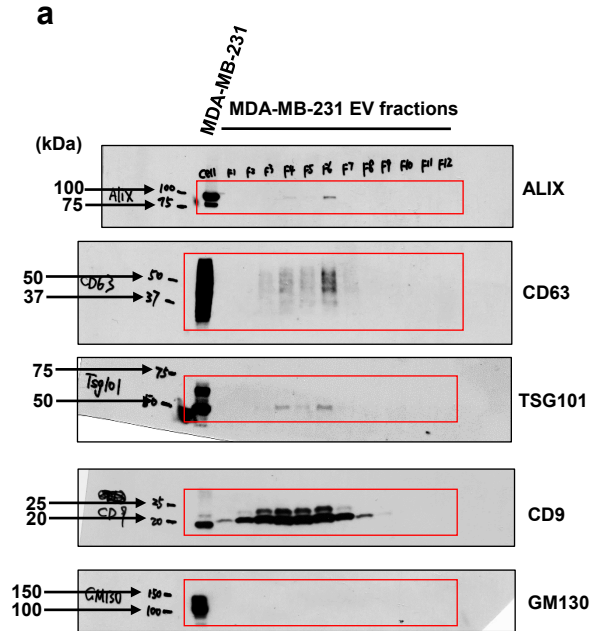

ALIX, TSG101 and CD9 were conducted from the same gel.

CD63 and GM130 were conducted from the same gel.
