# Supplementary material
Source: PubMed Central journal article supplement (PMC9233030)
Supplement: NIHMS1800385-supplement-Uncropped_Images_ExtendedData_Fig3.pdf [file NIHMS1800385-supplement-Uncropped_Images_ExtendedData_Fig3.pdf]

## Extended Data Figure 3

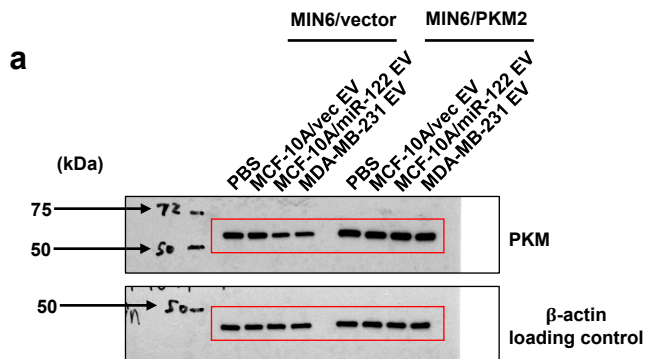

PKM and loading control  $\beta$ -actin were conducted from the same gel.

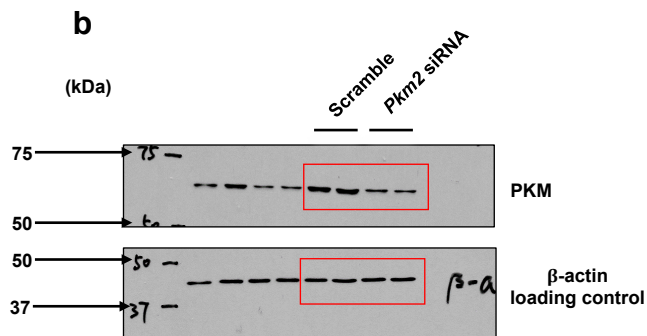

PKM and loading control  $\beta$ -actin were conducted from the same gel.
