# Supplementary material
Source: PubMed Central journal article supplement (PMC9233030)
Supplement: NIHMS1800385-supplement-Uncropped_Images_ExtendedData_Fig5.pdf [file NIHMS1800385-supplement-Uncropped_Images_ExtendedData_Fig5.pdf]

## Extended Data Figure 5

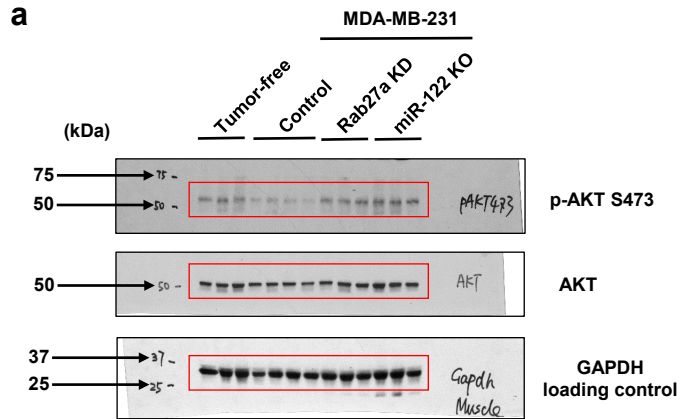

p-AKT S473 and loading control GAPDH were conducted from the same gel.

AKT was conducted by re-probing from the same blot as p-AKT S473.
