# Supplementary material
Source: PubMed Central journal article supplement (PMC9233030)
Supplement: NIHMS1800385-supplement-Uncropped_Images_Fig1.pdf [file NIHMS1800385-supplement-Uncropped_Images_Fig1.pdf]

**Figure 1**

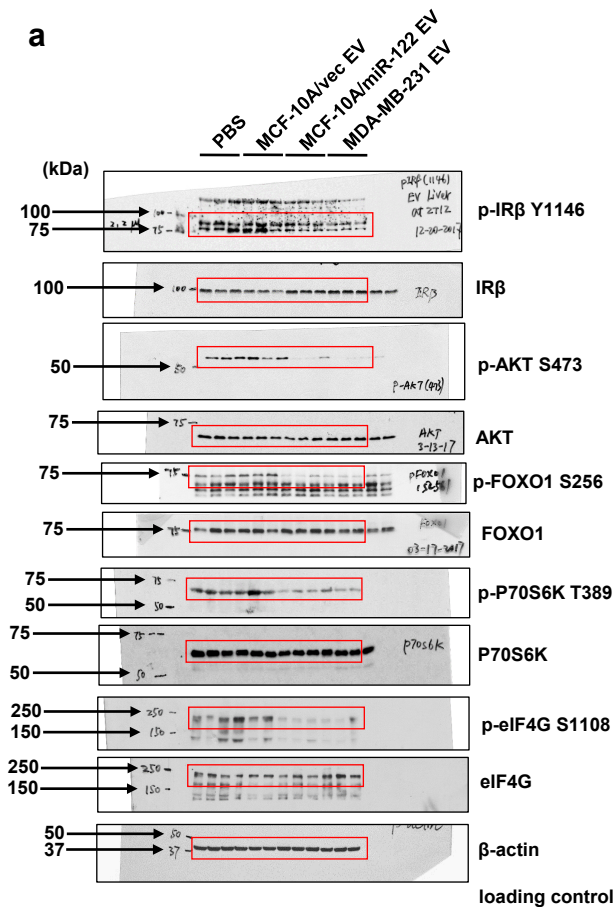

p-p70S6K T389, p-eIF4G S1108 and loading control β-actin were conducted from the same gel.

AKT and IRβ were conducted from the same gel.

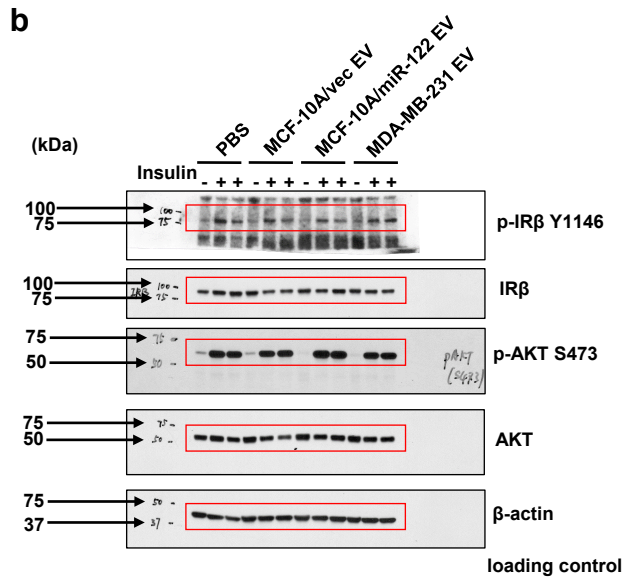

AKT and loading control β-actin were conducted from the same gel.

AKT was re-probed from the same blot as p-AKT S473.

IRβ was re-probed from the same blot as p-IRβ Y1146.
