# Supplementary material
Source: PubMed Central journal article supplement (PMC9233030)
Supplement: NIHMS1800385-supplement-Uncropped_Images_Fig3.pdf [file NIHMS1800385-supplement-Uncropped_Images_Fig3.pdf]

**Figure 3**

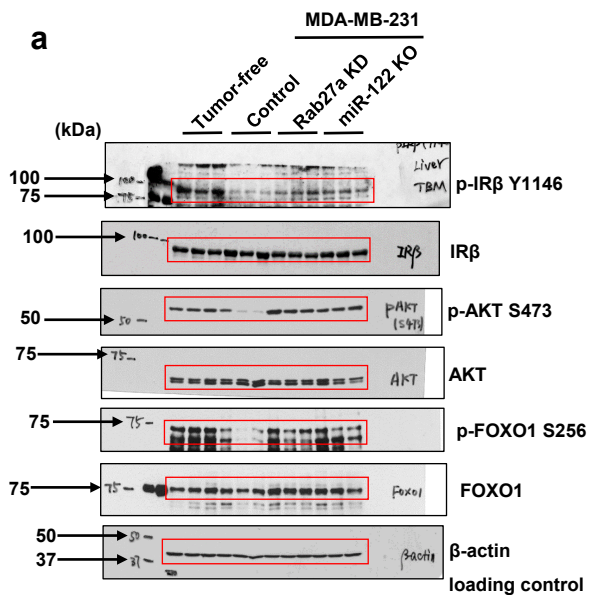

AKT and loading control β-actin were conducted from the same gel.

FOXO1 was re-probed from the same blot as p-FOXO1 S256.

IRβ was re-probed from the same blot as p-IRβ Y1146.

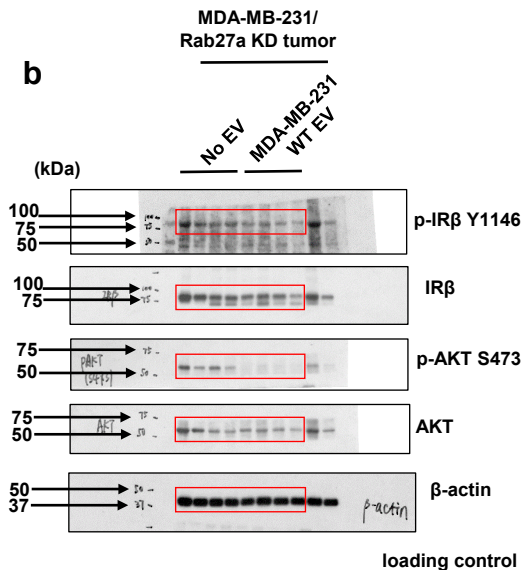

p-AKT S473 and loading control β-actin were conducted from the same gel.

AKT was re-probed from the same blot as p-AKT S473.

IRβ was re-probed from the same blot as p-IRβ Y1146.
