# Supplementary material
Source: PubMed Central journal article supplement (PMC9233030)
Supplement: NIHMS1800385-supplement-Uncropped_Images_Fig5.pdf [file NIHMS1800385-supplement-Uncropped_Images_Fig5.pdf]

**Figure 5**

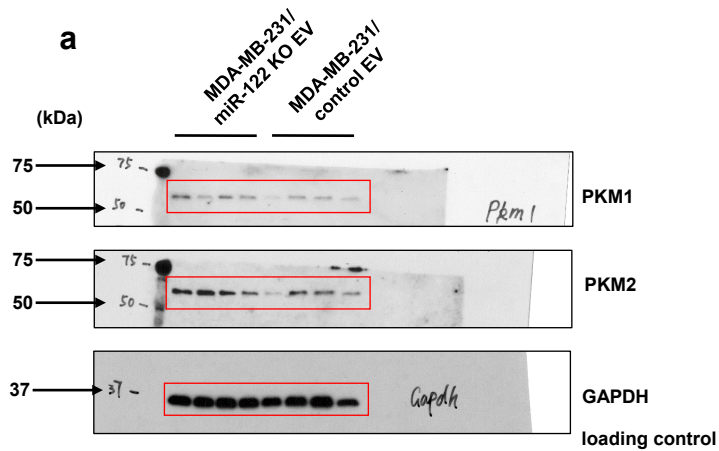

PKM1 and GAPDH were conducted from the same gel.

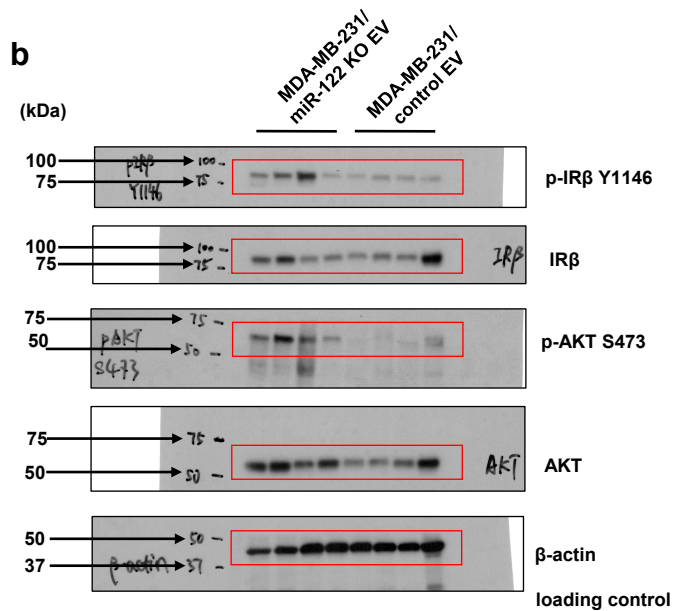

p-IRβ Y1146 and p-AKT S473 were conducted from the same gel.

AKT was re-probed from the same blot as p-AKT S473.

IRβ and β-actin were conducted from the same gel.
