# Supplementary material
Source: PubMed Central journal article supplement (PMC9233030)
Supplement: NIHMS1800385-supplement-Uncropped_Images_Fig6.pdf [file NIHMS1800385-supplement-Uncropped_Images_Fig6.pdf]

Figure 6

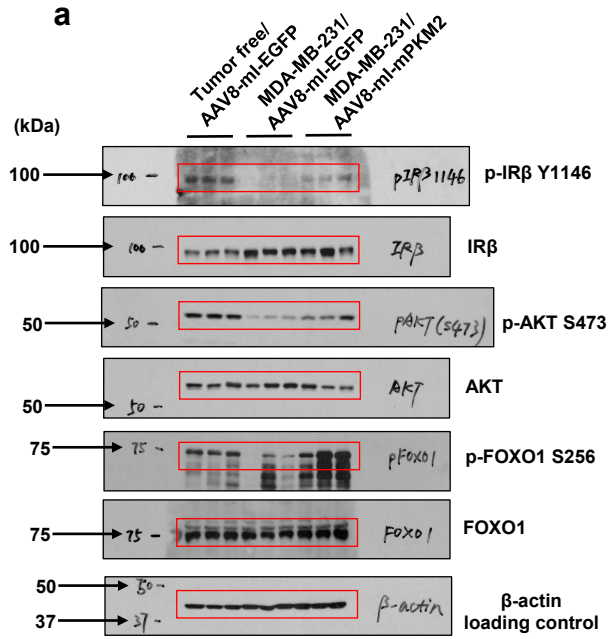

p-AKT S473, p-IRβ Y1146 and loading control β-actin were conducted from the same gel.

AKT and IRβ were conducted from the same gel.
