# Supplementary material
Source: PubMed Central journal article supplement (PMC9233030)
Supplement: NIHMS1800385-supplement-Uncropped_Images_Fig7.pdf [file NIHMS1800385-supplement-Uncropped_Images_Fig7.pdf]

Figure 7

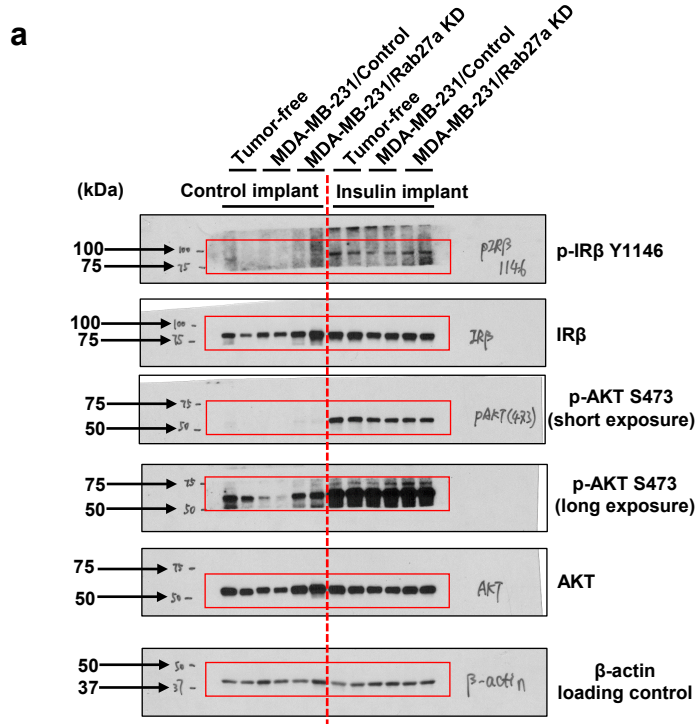

p-IRβ Y1146, p-AKT S473 and loading control were conducted from the same gel.

IRβ and AKT were conducted from the same gel.
