# Supplementary material
Source: PubMed Central journal article supplement (PMC9233030)

## Extended Data Figure 4

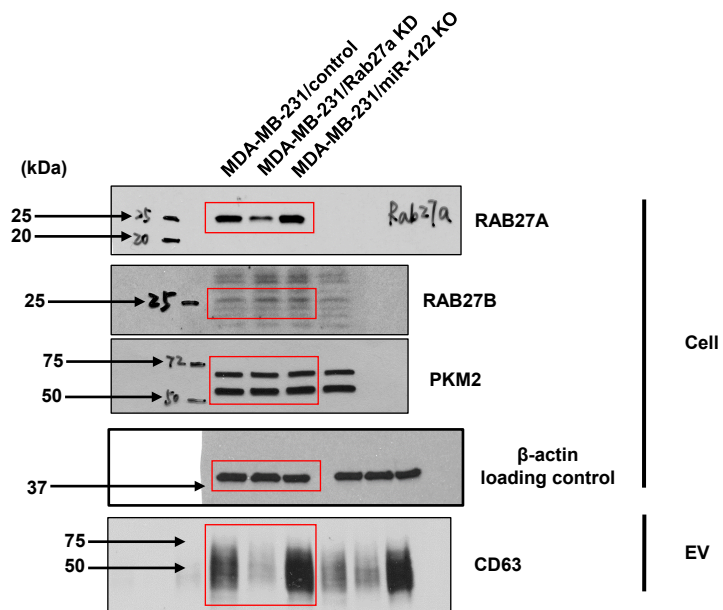

RAB27B and PKM2 were conducted from the same gel.

Supplement: NIHMS1800385-supplement-Uncropped_Images_ExtendedData_Fig4.pdf [file NIHMS1800385-supplement-Uncropped_Images_ExtendedData_Fig4.pdf]

## Extended Data Figure 8

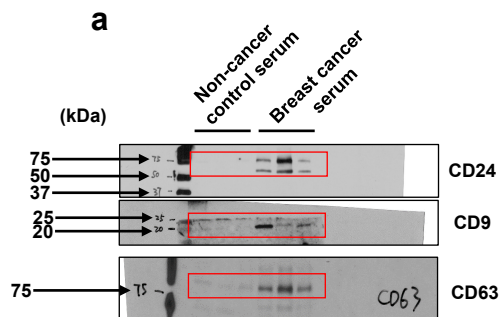

CD24 and CD9 were conducted from the same gel.

Supplement: NIHMS1800385-supplement-Uncropped_Images_ExtendedData_Fig8.pdf [file NIHMS1800385-supplement-Uncropped_Images_ExtendedData_Fig8.pdf]

Figure 2

a

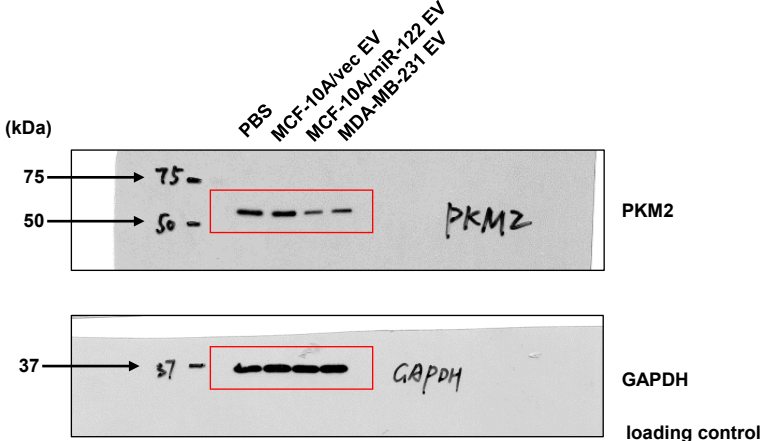

PKM2 and loading control GAPDH were conducted from the same gel.

Supplement: NIHMS1800385-supplement-Uncropped_Images_Fig2.pdf [file NIHMS1800385-supplement-Uncropped_Images_Fig2.pdf]

**Figure 4**

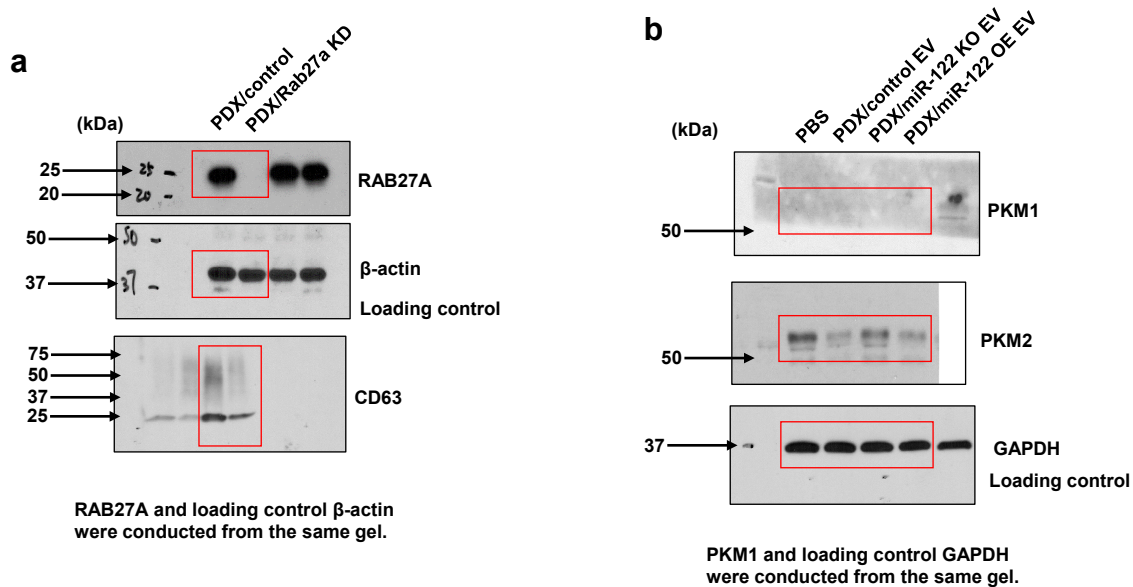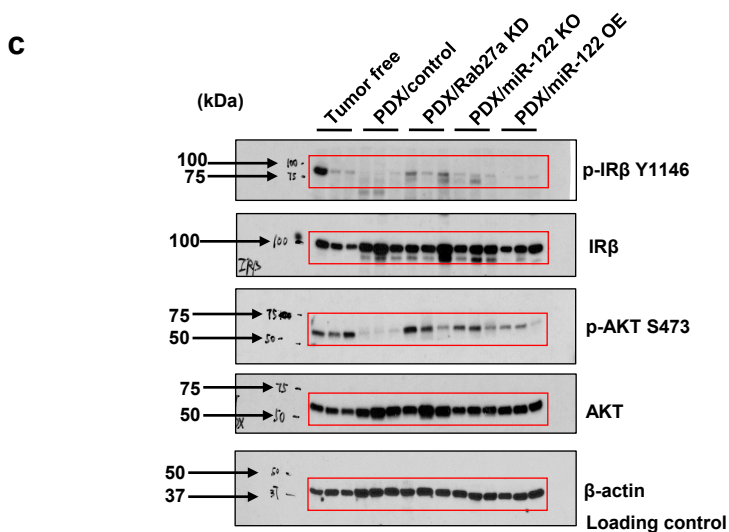

Supplement: NIHMS1800385-supplement-Uncropped_Images_Fig4.pdf [file NIHMS1800385-supplement-Uncropped_Images_Fig4.pdf]
